# Supplementary material for: Association Analysis of the FTO Gene with Obesity in Children of Caucasian and African Ancestry Reveals a Common Tagging SNP
Source: PLoS One. 2008 Mar 12;3(3):e1746. doi: 10.1371/journal.pone.0001746 (PMC2262153; doi:10.1371/journal.pone.0001746)

**Figure S2.** *FTO* region of LD in the relevant cohorts from the HapMap project:  $|D'|$  and  $r^2$

***FTO*: CEU**  
 **$|D'|$**

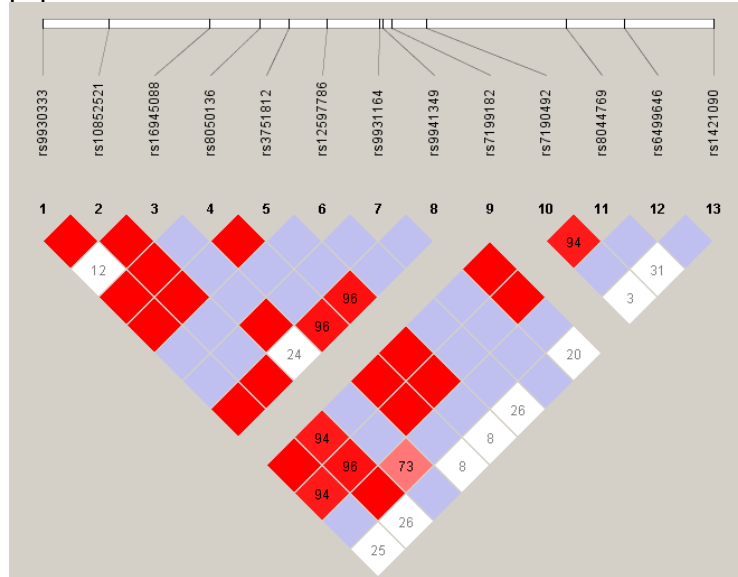

**$r^2$**

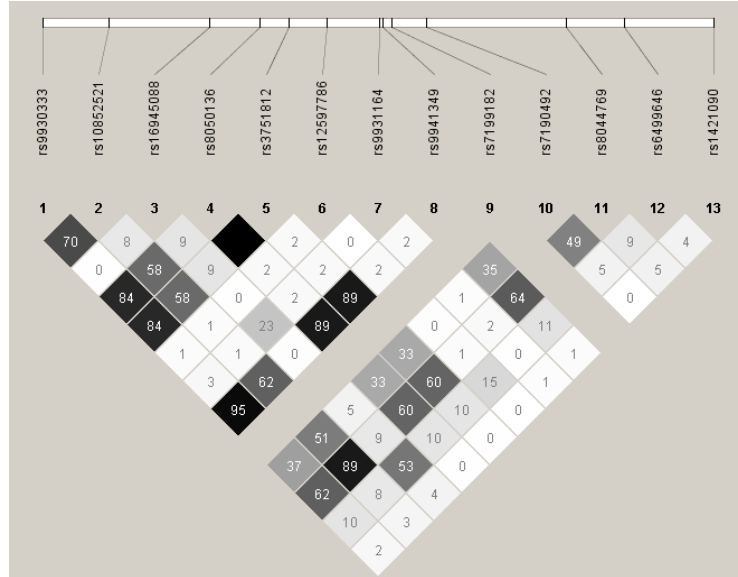

***FTO*: YRI**  
 **$|D'|$**

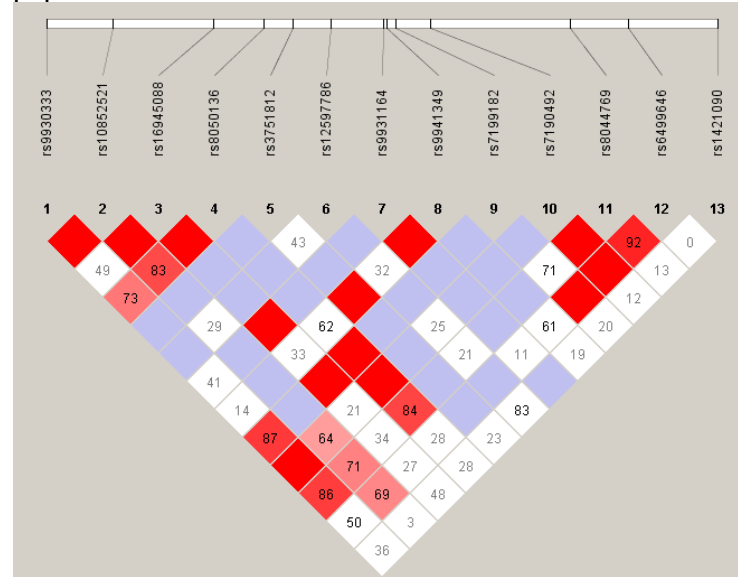

**$r^2$**

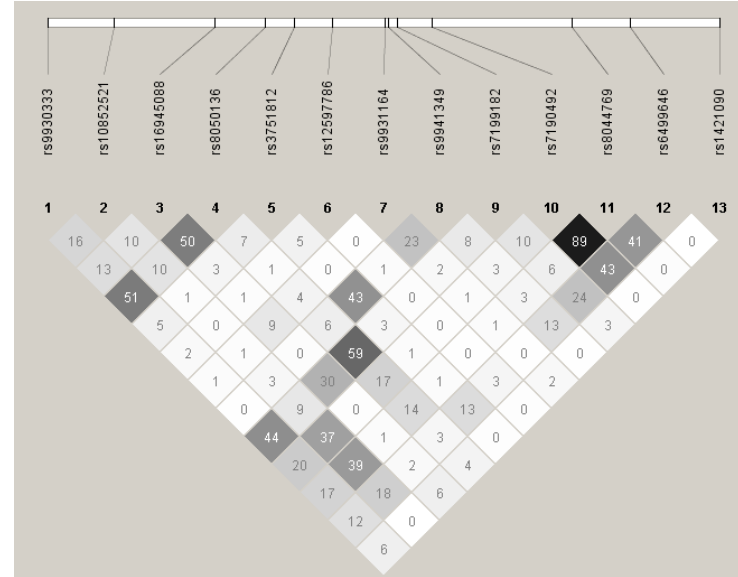

Supplement: Figure S2 — FTO region of LD in the relevant cohorts from the HapMap project (0.06 MB PDF) [file pone.0001746.s004.pdf]
