# Supplementary material for: Association Analysis of the FTO Gene with Obesity in Children of Caucasian and African Ancestry Reveals a Common Tagging SNP
Source: PubMed Central journal article supplement (PMC2262153; doi:10.1371/journal.pone.0001746), 2008-03-12
Supplement: pone.0001746.s001.pdf [file pone.0001746.s001.pdf]

**Table S1.** Haplotype frequencies in the Caucasian study cohort.

| <b>Haplotype</b>        | <b>Frequency</b> |
|-------------------------|------------------|
| G C A A T C A T G C T T | 0.305            |
| T T A C G C A C A T T T | 0.237            |
| G C A A T C A T G C T C | 0.088            |
| T T A C G C A C A T T C | 0.085            |
| T T A C G C A C G T T T | 0.081            |
| T C G C G C A C G C C T | 0.053            |
| T T A C G C A C G T T C | 0.049            |
| G C G C G C G T G C T T | 0.019            |
| T C G C G C A C G C C C | 0.014            |
| G C A C G C A C G T T T | 0.013            |
| T T A C G C A C A C T C | 0.013            |
| T C A C G T A C G C C T | 0.010            |
