# Supplementary material for: Association Analysis of the FTO Gene with Obesity in Children of Caucasian and African Ancestry Reveals a Common Tagging SNP
Source: PubMed Central journal article supplement (PMC2262153; doi:10.1371/journal.pone.0001746), 2008-03-12
Supplement: pone.0001746.s002.pdf [file pone.0001746.s002.pdf]

**Table S2.** Quantitative analysis of BMI results for *FTO* region markers perfectly correlated with Frayling *et al* in Caucasians (**bold**) plus all other markers present on the BeadChip in the corresponding HapMap CEU LD block in our (a) Caucasian and (b) African American cohorts respectively.

**(a) QTL for BMI in the Caucasian cohort**

| Chr       | SNP              | B35 location    | Minor Allele | Major Allele | NMISS       | BETA           | SE             | R2              | T             | P             |
|-----------|------------------|-----------------|--------------|--------------|-------------|----------------|----------------|-----------------|---------------|---------------|
| 16        | rs9930333        | 52357478        | T            | G            | 2630        | 0.08648        | 0.03191        | 0.002787        | 2.7100        | 0.0068        |
| 16        | rs10852521       | 52362466        | T            | C            | 2632        | -0.06088       | 0.0316         | 0.001409        | -1.9260       | 0.0542        |
| 16        | rs16945088       | 52370025        | G            | A            | 2630        | -0.07592       | 0.05542        | 0.0007135       | -1.3700       | 0.1709        |
| <b>16</b> | <b>rs8050136</b> | <b>52373776</b> | <b>A</b>     | <b>C</b>     | <b>2625</b> | <b>0.1037</b>  | <b>0.0323</b>  | <b>0.003919</b> | <b>3.2120</b> | <b>0.0013</b> |
| <b>16</b> | <b>rs3751812</b> | <b>52375961</b> | <b>T</b>     | <b>G</b>     | <b>2610</b> | <b>0.09931</b> | <b>0.03231</b> | <b>0.00361</b>  | <b>3.0740</b> | <b>0.0021</b> |
| 16        | rs12597786       | 52378808        | T            | C            | 2631        | 0.02254        | 0.1121         | 1.54E-05        | 0.2010        | 0.8407        |
| 16        | rs9931164        | 52382739        | G            | A            | 2633        | -0.003899      | 0.118          | 4.15E-07        | -0.0331       | 0.9736        |
| 16        | rs9941349        | 52382989        | T            | C            | 2633        | 0.09884        | 0.03215        | 0.003579        | 3.0740        | 0.0021        |
| 16        | rs7199182        | 52383621        | G            | A            | -           | -              | -              | -               | -             | -             |
| 16        | rs7190492        | 52386253        | A            | G            | 2578        | -0.06477       | 0.03335        | 0.001462        | -1.9420       | 0.0523        |
| 16        | rs8044769        | 52396636        | T            | C            | 2632        | -0.08179       | 0.03163        | 0.002536        | -2.5860       | 0.0098        |
| 16        | rs6499646        | 52401034        | C            | T            | 2628        | -0.02667       | 0.05496        | 8.97E-05        | -0.4853       | 0.6275        |
| 16        | rs1421090        | 52407671        | C            | T            | 2628        | -0.03454       | 0.03629        | 0.0003448       | -0.9518       | 0.3413        |

**(b) QTL for BMI in the African American cohort**

| Chr       | SNP              | B35 location    | Minor Allele | Major Allele | NMISS       | BETA           | SE              | R2              | T             | P             |
|-----------|------------------|-----------------|--------------|--------------|-------------|----------------|-----------------|-----------------|---------------|---------------|
| 16        | rs9930333        | 52357478        | G            | T            | 1966        | 0.04355        | 3.90E-02        | 0.0006339       | 1.1160        | 0.2645        |
| 16        | rs10852521       | 52362466        | T            | C            | 1968        | -0.05961       | 0.04377         | 0.0009425       | -1.3620       | 0.1734        |
| 16        | rs16945088       | 52370025        | G            | A            | 1963        | 0.0123         | 0.04219         | 4.33E-05        | 0.2915        | 0.7707        |
| <b>16</b> | <b>rs8050136</b> | <b>52373776</b> | <b>A</b>     | <b>C</b>     | <b>1960</b> | <b>0.05674</b> | <b>3.98E-02</b> | <b>0.001039</b> | <b>1.4270</b> | <b>0.1537</b> |
| <b>16</b> | <b>rs3751812</b> | <b>52375961</b> | <b>T</b>     | <b>G</b>     | <b>1962</b> | <b>0.04218</b> | <b>6.56E-02</b> | <b>0.000211</b> | <b>0.6431</b> | <b>0.5202</b> |
| 16        | rs12597786       | 52378808        | T            | C            | 1965        | -0.05468       | 0.1285          | 9.22E-05        | -0.4255       | 0.6705        |
| 16        | rs9931164        | 52382739        | G            | A            | 1968        | -0.04239       | 0.09297         | 0.0001057       | -0.4559       | 0.6485        |
| 16        | rs9941349        | 52382989        | T            | C            | 1967        | 0.01067        | 0.05158         | 2.18E-05        | 0.2069        | 0.8361        |
| 16        | rs7199182        | 52383621        | G            | A            | 1952        | 0.05148        | 0.04276         | 0.0007427       | 1.2040        | 0.2288        |
| 16        | rs7190492        | 52386253        | A            | G            | 1932        | -0.03174       | 0.04955         | 0.0002126       | -0.6406       | 0.5219        |
| 16        | rs8044769        | 52396636        | T            | C            | 1968        | -0.03779       | 0.04692         | 0.0003299       | -0.8055       | 0.4206        |
| 16        | rs6499646        | 52401034        | T            | C            | 1965        | 0.0005684      | 0.04068         | 9.95E-08        | 0.0140        | 0.9889        |
| 16        | rs1421090        | 52407671        | C            | T            | 1968        | 0.02868        | 0.04375         | 0.0002185       | 0.6555        | 0.5122        |

NMISS: number of individuals tested; BETA: regression coefficient for the test SNP; SE: standard error of the regression coefficient; R2:  $r^2$  value in linear regression; T: test statistic; P: *P*-value
