# Supplementary material for: Association Analysis of the FTO Gene with Obesity in Children of Caucasian and African Ancestry Reveals a Common Tagging SNP
Source: PubMed Central journal article supplement (PMC2262153; doi:10.1371/journal.pone.0001746), 2008-03-12

**Figure S1.** *FTO* region of LD in cohorts in the study:  $|D'|$  and  $r^2$

***FTO*: Caucasians**  
 **$|D'|$**

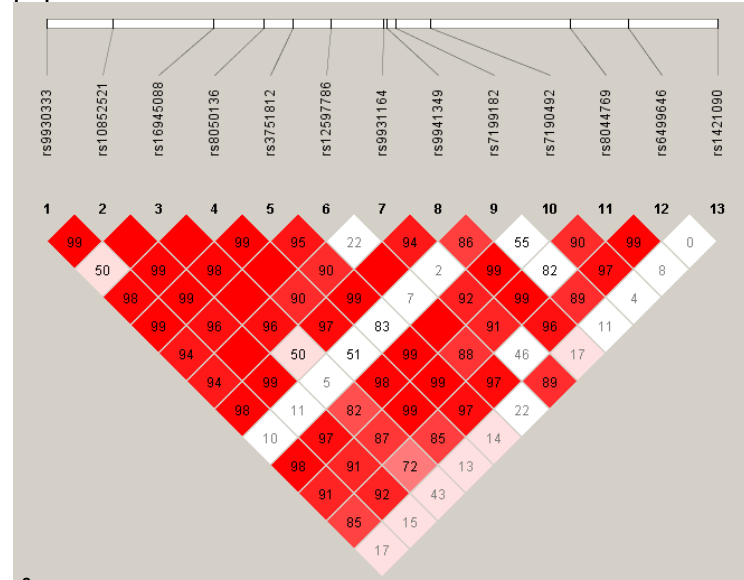

**$r^2$**

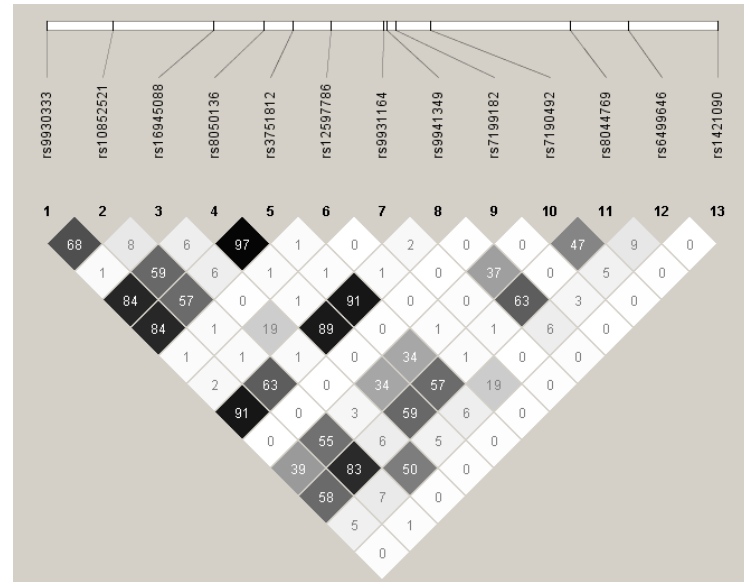

***FTO*: African Americans**  
 **$|D'|$**

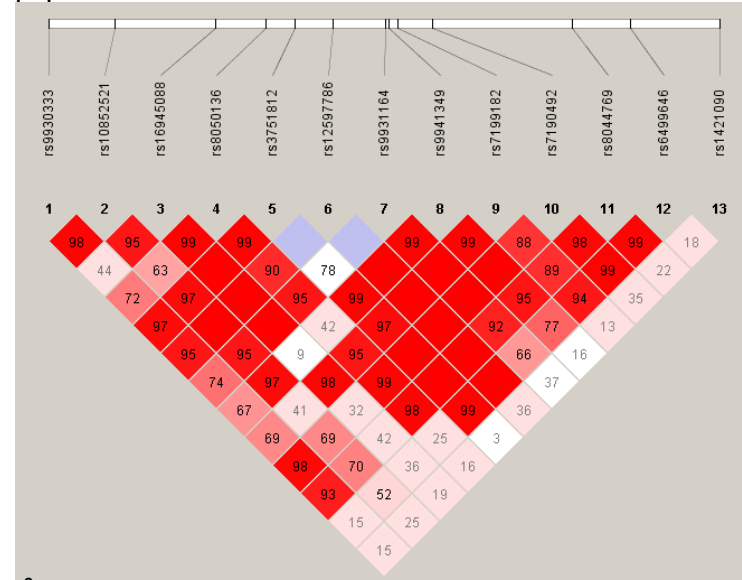

**$r^2$**

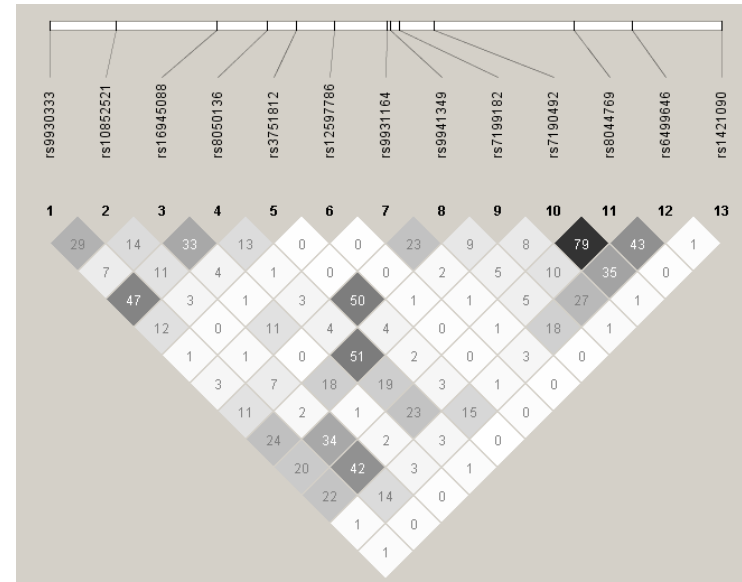

Supplement: pone.0001746.s003.pdf [file pone.0001746.s003.pdf]
